1 *Short title: Synergy of shallow roots and localized P supply*

2 Corresponding author. Tel/Fax: +81 29 838 6367; E-mail address: tsjmt@affrc.go.jp (Yasuhiro  
3 Tsujimoto)

4

5 **Synergy between a shallow root system with a *DROI* homologue and localized P**  
6 **application improves rice P uptake**

7 Aung Zaw Oo<sup>1#</sup>, Yasuhiro Tsujimoto<sup>1,# \*</sup>, Mana Mukai<sup>1</sup>, Tomohiro Nishigaki<sup>1</sup>, Toshiyuki Takai<sup>1</sup>,  
8 Yusaku Uga<sup>2</sup>

9 <sup>1</sup>Japan International Research Center for Agricultural Sciences, 1-1 Ohwashi, Tsukuba, Ibaraki  
10 3058686, Japan

11 <sup>2</sup>Institute of Crop Science, National Agriculture and Food Research Organization (NARO),  
12 2-1-2, Kan-nondai, Tsukuba, Ibaraki 3058518, Japan

13 #These authors contributed equally to this work.

14 *Author contributions:* A.Z.O., and Y.T. designed research and analyzed data; A.Z.O., Y.T.,  
15 M.M., and T.N. performed research; A.Z.O., and Y.T. wrote the article with contribution of all  
16 authors; Y.U. developed and provided plant materials; All authors reviewed, revised and  
17 approved the articles; Y.T. agrees to serve as the author responsible for contact and ensures  
18 communication.

19 *One sentence summary:* A combination of a micro-dose, localized phosphorus (P) application  
20 and a shallow root system improves rice P uptake which can increase crop production with  
21 reduced environmental impacts.

22 *Funding:* Science and Technology Research Partnership for Sustainable Development  
23 (SATREPS), Japan Science and Technology Agency (JST)/Japan International Cooperation  
24 Agency (JICA) (Grant No. JPMJSA1608); CREST, Japan Science and Technology Agency  
25 (JST) (Grant Number JPMJCR1701)

26

27 **ABSTRACT**

28 The development of genotypes and fertilizer management practices that facilitate high  
29 phosphorus (P) use efficiency is needed given the depleting phosphorus ore deposits and  
30 increasing ecological concerns about its excessive use. Root system architecture (RSA) is  
31 important in efficiently capturing immobile P in soils, while agronomically, localized P  
32 application near the roots is a potential approach to address this issue. However, the interaction  
33 between genetic traits of RSA and localized P application has not been examined. Near-isogenic  
34 lines (NILs) and their parent of rice (*qsor1*-NIL, *Dro1*-NIL, and IR64, with shallow, deep, and  
35 intermediate root growth angles (RGA), respectively) were grown in flooded pots in a uniform  
36 and P-sufficient condition ( $P_{inco}$ ), and with localized P application by dipping seedling roots into  
37 P-enriched slurry at transplanting (P-dipping). The P-dipping created an available P hotspot at  
38 the soil surface and substantially improved applied P-use efficiency (equivalent biomass at one  
39 fifth of application rate of the  $P_{inco}$ ). Further, the *qsor1*-NIL had significantly greater biomass  
40 and P uptake than the other genotypes in the P-dipping. The *qsor1*-NIL consistently had a  
41 greater root biomass and surface area in the 0–3 cm soil layer, despite that there were no  
42 genotype differences in total values and that the other genotypes also reduced their RGAs  
43 responding to the P hotspot in the P-dipping. The shallow root system of *qsor1*-NIL facilitated  
44 P uptake from the P hotspot. P-use efficiency in crop production can be further increased by  
45 combining genetic traits of RSA and localized P application.

46 **Keywords:** near-isogenic line, *Oryza sativa* L., phosphorus deficiency, P-dipping, root system  
47 architecture (RSA), root plasticity, root growth angle (RGA)

48

## 49 INTRODUCTION

50 Phosphorous deficiency restricts crop growth, particularly in the tropics, due to the inherently  
51 low P content of soils and the high P-fixing capacity of other minerals such as active Al- and  
52 Fe- oxides (Walker and Syers 1976). Large amounts of mineral P fertilizer have been  
53 continuously applied to overcome low P-use efficiency and achieve high grain yields. Given the  
54 finite nature of the P fertilizer resource and increasing ecological concerns about the excess use  
55 of P in agricultural systems (Vance et al. 2003; Carpenter and Bennett 2011; Nedelciu et al.  
56 2020), it is vital to investigate sustainable crop production strategies that facilitate the efficient  
57 utilization of applied and available P in soils. Such strategies are also critical for the food  
58 security of resource-poor farmers with low fertilizer inputs in developing countries (Tsujiimoto  
59 et al. 2019).

60 Roots play a pivotal role in exploring immobile P in the soil. An increased root surface area  
61 with minimal carbon costs is one strategy, through the formation of finer roots, aerenchyma,  
62 and root hairs (Lynch and Ho, 2005; Nestler et al. 2016; Lynch 2019). Changes in root system  
63 architecture (RSA) such as the development of surface roots is another root function to adapt to  
64 P deficiency, that is so called topsoil foraging, because P is most available in surface soil layers  
65 (Lynch and Brown, 2001). This topsoil foraging can be enhanced by a shallower growth angle  
66 of axial roots (Lynch and Brown, 2001), adventitious root abundance (Miller et al. 2003), and  
67 many/short lateral root branching (Jia et al. 2018). Field-based studies have demonstrated the  
68 yield advantages of genotypes with these architectural traits for several crops under  
69 P-deficiency (Lynch 2019). Therefore, identification of key root traits and their genetic

70 mechanisms and conferring genes or quantitative trait loci (QTL) should offer avenues for  
71 improving P acquisition efficiency in crop breeding (Burridge et al. 2019).

72 Agronomic approach for improving P-use efficiency includes localized fertilization, which  
73 refers to the placement of small amounts of fertilizers nearby the root zone. Several field  
74 experiments have demonstrated the positive impacts of localized P fertilization on grain yields  
75 and/or fertilizer use efficiencies for crop production (e.g., Vandamme et al. 2018). Our recent  
76 study identified that applied P-use efficiency can be substantially improved by dipping seedling  
77 roots in P-enriched slurry at transplanting (P-dipping) in severely P-deficient rice fields in  
78 Madagascar (Rakotoarisoa et al. 2020). The P-dipping transfers P, with the slurry attached to  
79 seedling roots, creating a soluble P hotspot nearby the transplanted roots and facilitating plant P  
80 uptake, even under the high P-fixing soils of the tropics (Oo et al. 2020). The use of P-dipping  
81 is currently being tested by hundreds of smallholder farmers in Madagascar.

82 Despite a range of studies in both genetic and agronomic approaches, none have examined how  
83 the combination of RSA traits and localized fertilization would affect plant P-use and  
84 acquisition efficiencies. In the present study, we aimed to identify the combination effect by  
85 using near-isogenic lines (NILs) of *DRO1* and its homologue (*qSOR1*), the major QTLs of rice  
86 controlling root growth angle (RGA). The parent variety, IR64, is a high-yielding, modern  
87 variety with a relatively shallow RGA with the combination of the nonfunctional allele of  
88 *DRO1* and the functional allele of *qSOR1*. The *Dro1*-NIL, developed by Uga et al. (2013), has a  
89 relatively deep RGA with the combination of functional alleles of both *DRO1* and *qSOR1*. The  
90 *qsor1*-NIL, developed by Kitomi et al. (2020), has a shallower RGA than IR64, with the  
91 combination of nonfunctional alleles of both *DRO1* and *qSOR1*. We hypothesize that P-dipping,

92 creating the P hotspot at the soil surface, will have a positive interaction with the shallow root  
93 system in rice. By understanding the interaction, further research can be expected to improve  
94 applied P use efficiencies by designing RSA traits for localized fertilizer application techniques.

95

## 96 **RESULTS**

97 Localized P application via P-dipping ( $P_{\text{dip}}$ ) achieved equivalent biomass and P uptakes at one  
98 fifth of the application rate of uniform P incorporation ( $P_{\text{inco}}$ ) (Fig. 1). The ANOVA detected  
99 consistent and significant interactions between genotype and P treatment for shoot biomass and  
100 P uptakes at both 21 days after transplanting (DAT) and 42 DAT. In the  $P_{\text{dip}}$  treatment,  
101 *qsor1*-NIL consistently had greater shoot biomass and P uptake than *Dro1*-NIL. In contrast, in  
102  $P_{\text{inco}}$ , *Dro1*-NIL tended to have greater shoot biomass and significantly greater P uptakes than  
103 the other genotypes at 42 DAT. Applied P-use efficiency (calculated as the ratio of shoot P  
104 uptake at 42 DAT to the amount of P applied) increased from 3.4% to 16.2% for IR64 by  
105 changing the P application methods from P incorporation to P-dipping and further increased to  
106 20.0% by using *qsor1*-NIL (data not shown).

107 The RSA traits among genotypes were consistent under  $P_{\text{dip}}$ : the RGA was the shallowest in the  
108 order of *qsor1*-NIL > IR64 > *Dro1*-NIL at both 21 DAT and 42 DAT (Fig. 2). As a result of the  
109 RGA differences, *qsor1*-NIL developed a large proportion of root biomass and root surface area  
110 in the 0–3 cm layer and little in the 14–28 cm layer. In contrast, *Dro1*-NIL distributed a  
111 relatively large proportion of root mass in the 14–28 cm layer. For instance, at 21 DAT,  
112 *qsor1*-NIL developed 50.3% of the root mass in the 0–3 cm layer and only 2.0% in the 14–28

113 cm layer while these proportions were 32.7% and 10.3% for *Dro1*-NIL. The root distribution  
114 pattern of IR64 was intermediate between *qsor1*-NIL and *Dro1*-NIL. The trend in RSA among  
115 genotypes were the same in P<sub>inco</sub> while IR64 and *Dro1*-NIL tended to have deeper RGAs than  
116 those in P<sub>dip</sub> (Fig. 3). The RGAs of *qsor1*-NIL, IR64, and *Dro1*-NIL at 21 DAT were 7.1°, 23.6°,  
117 and 33.3° in P<sub>dip</sub> and 5.0°, 39.8°, and 52.2° in P<sub>inco</sub>.

118 By reflecting the differences in RSA, *Dro1*-NIL had a greater root biomass, greater root surface  
119 areas, and longer lateral and nodal root length than the other genotypes in the 14–28 cm layer  
120 (the difference was only significant vs. *qsor1*-NIL), despite its significantly lower values in the  
121 total for these parameters at 21 DAT (Fig. 4). At 42 DAT, there were no significant differences  
122 in the total values of these parameters except nodal root length, whereas genotype root  
123 distribution patterns were retained within each soil layer: the *qsor1*-NIL had significantly  
124 greater root mass, greater root surface area, and longer nodal root length than *Dro1*-NIL in the  
125 0–3cm layer and vice versa in 14–28 cm (Fig. 4). IR64 was intermediate for these parameters in  
126 both the 0–3 cm and 14–28 cm layers.

127 Soluble P concentrations in soils were averaged across genotypes because there were no  
128 significant genotype differences in any sampling times or sampling layers. The P<sub>dip</sub> had a  
129 substantially large soluble P concentration at a depth of 3 cm (Fig. 5). The maximum P  
130 concentration at a depth of 3 cm for P<sub>dip</sub> was >100 times greater than the other depths for both P  
131 treatments throughout the growing period. In P<sub>dip</sub>, soluble P concentrations were greater at a  
132 depth of 7 cm than at 21 cm in the latter growth stages, but apparently the vertical P diffusion  
133 from the 3 cm hotspot was relatively small. In contrast, the soluble P concentrations were  
134 significantly higher at a depth of 21 cm than at 7 cm in P<sub>inco</sub> after 28 DAT.

135

136 **DISCUSSION**

137 The results support the hypothesis that the shallow root system of *qsor1*-NIL has a positive  
138 interaction with localized P application via P-dipping and that the combination additively  
139 improves applied P-use efficiency for initial rice growth. The other genotypes also reduced the  
140 RGA by 16–19° in response to the P hotspot (Fig. 2, 3), yet the synergy with P-dipping was  
141 greater in *qsor1*-NIL. This implies that breeding efforts to design the RGA in localized P spots  
142 can be more beneficial than relying on the intrinsic root plasticity of each genotype.

143 Superior P uptake of *qsor1*-NIL with P-dipping is attributable to the greater root biomass and  
144 root surface area in the 0–3 cm soil layer where high soluble P is available throughout the  
145 growing period. This is most likely the same mechanism as topsoil foraging, prioritizing the  
146 root development in the P-rich domains to efficiently capture immobile P in soils.  
147 Spatio-temporal P variations in the P-dipping indicate that applied P mobility is highly  
148 restricted despite a general understanding that P becomes less immobile under flooded  
149 conditions (Turner and Gilliam, 1976), emphasizing the importance of RSA for the localized P  
150 acquisition, even under flooded soil culture. The effect of topsoil foraging itself has been  
151 reported in several upland crops (Zhu et al. 2005; Miguel et al. 2015; Jia et al. 2018; Sun et al.  
152 2018), but not in rice. Previous studies detected no significant effects of root distribution  
153 patterns or RGA for rice P acquisition under P deficiency (e.g., Mori et al. 2016), which may be  
154 due to the materials differing not only in root system architecture but in other traits or in more  
155 complex screening environments. The present study had an advantage using NILs differing in

156 RGAs otherwise equivalent phenotypes (Kitomi et al. 2020) under non-water-stressed and  
157 greatly uneven P availability by P-dipping.

158 In addition, the present study detected a positive effect of *Dro1-NIL* for P uptake under uniform,  
159 P-sufficient conditions. The reason for this positive interaction should be further explored but  
160 can be related to consistent P acquisition from the P-rich subsoil layers after the depletion of  
161 available P in topsoil layers (Fig. 5). Another potential reason is the more efficient acquisition  
162 of other nutrients, such as N, which is vertically more mobile than P. Deep rooting has been  
163 reported as a positive trait for N acquisition of upland crops (Lynch, 2019) and also of rice in  
164 flooded paddy fields in the latter growth stages (Arai-Sanoh, 2014). In common bean,  
165 Rangarajan et al. (2018) postulated that the greater vertical range of roots with deeper RGA and  
166 greater number of basal root whorls is advantageous for biomass production when both N and P  
167 are deficient. Likewise, dispersed root distribution of *Dro1-NIL* might have benefited from  
168 relatively uniform nutrient conditions of the  $P_{inco}$  treatment. *Dro1-NIL* had significantly smaller  
169 coefficient of variations across soil layers in root biomass at 42 DAT than *qSOR1* (23% vs.  
170 47%), indicating more uniform and dispersed root development.

171 It should be noted that crop production environments are complex with multiple abiotic stresses,  
172 particularly on smallholder farms in developing countries where stress-resilient and  
173 nutrient-efficient technologies are most needed. With this respect, field-based experiments to  
174 maturity are further required to confirm the combination effect between genetic RSA traits and  
175 P fertilizer management practices. The combination of shallow roots and localized P application  
176 can never be a silver bullet. A careful selection of field environments where P deficiency is the  
177 primary limiting factor is needed to effectively apply this combination, ideally together with the



178 development of bimodal root phenotypes (shallow and deep) against complex growing  
179 environments. In rice, *qSOR1* and *DRO1* can be promising genetic resources for the  
180 development of such bimodal root phenotypes, as indicated by previous studies (Rose et al.  
181 2013; Uga et al. 2015).

182

## 183 **CONCLUSION**

184 The study provides a significant evidence by using NILs differing in their RGA that a shallow  
185 root system has a positive interaction with localized P application nearby the root at  
186 transplanting, and the combination substantially improves applied-P use efficiency for initial  
187 rice growth. This finding should encourage relevant research focusing not only on physiological  
188 root traits or agronomic management approaches, but on their combination to address to the  
189 global issue of increasing crop production while minimizing the environmental impacts.

190

## 191 **MATERIALS AND METHODS**

### 192 **Experimental design and treatments**

193 The experiment was conducted in a greenhouse with an automatic ventilation system at the  
194 Japan International Research Center for Agricultural Science (JIRCAS), Tsukuba, Japan. The  
195 average daytime and nighttime temperatures during the experiment ranged from 26.2° to 35.8°C  
196 and 24.7° to 28.7°C, respectively (Thermo Recorder TR-50U2, T&D Corporation, Japan).

197 The soil for the experiment was collected from a subsoil layer (40–50 cm in depth) at the JIRCAS  
198 Tropical Agricultural Research Front, Okinawa, Japan. The soil was sandy clay and had low pH

199 (H<sub>2</sub>O) of 4.86, low available P content, and high P retention capacity with abundant active Al and  
200 Fe oxides. The soil was air-dried and passed through an 8 mm sieve prior to the experiment.

201 Two different P treatments (sufficient P incorporation (P<sub>inco</sub>) and localized P application via  
202 P-dipping (P<sub>dip</sub>)) were factorially combined with three rice genotypes in a randomized complete  
203 block design with seven replications. For both treatments, NH<sub>4</sub>NO<sub>3</sub> and K<sub>2</sub>SO<sub>4</sub> were mixed with  
204 soils and puddled in a bucket at a rate of 220 mg N box<sup>-1</sup> and 220 mg K<sub>2</sub>O box<sup>-1</sup> to develop uniform  
205 and N- and K-sufficient conditions. For the P<sub>inco</sub>, triple super phosphate (TSP) was added at  
206 puddling. Then, the mixed soils were filled into a root box at a rate of 500 mg P<sub>2</sub>O<sub>5</sub> box<sup>-1</sup> to develop  
207 a uniform and P-sufficient condition. The root box was made of transparent acrylic sheets with a  
208 size of 30 cm height × 30 cm length × 3 cm width. The soil was added to the box to a depth of 28  
209 cm.

210 For the P<sub>dip</sub> treatment, a P solution was placed in a spot nearby the transplanted root zone to apply  
211 the exact amount of P in all boxes. We estimated the amount of P-enriched slurry transferred or  
212 attached to seedling roots at transplanting as 90 mg P<sub>2</sub>O<sub>5</sub> box<sup>-1</sup> based on our previous study (Oo et  
213 al., 2020). After the N- and K- added soil was filled in the root box, 90 mg P<sub>2</sub>O<sub>5</sub> as TSP dissolved in  
214 20 ml water was injected into the soil at a depth of 3 cm in the center of the root box. On the same  
215 day of these P treatments, one 10-day old seedling was transplanted in the middle of each root box  
216 and grown under continuously flooded conditions.

## 217 **Measurement**

218 Soil solution samplers (DIK-8393, Daiki Rika Kogyo Co. Ltd., Japan) were installed in one side  
219 of the acrylic board in the middle of the 3 cm, 7 cm, and 21 cm depths for four out of seven

220 replicates. Soil water samples were collected at 3, 7, 14, 21, 28, and 35 DAT. The samples were  
221 analyzed for soluble P concentration using a microplate reader spectrophotometer at an  
222 absorbance of 630 nm by following the Malachite Green method (Motomizu et al., 1983).

223 Three and four replicates were harvested at 21 DAT and 42 DAT, respectively. At each harvest  
224 time, shoots were cut at ground level and oven-dried at 70 °C for > 48 h to determine shoot  
225 biomass. Shoot P concentration was measured with the molybdate blue method (Motomizu et  
226 al., 1983) after dry-ashing at 550 °C for 2 h and digestion with 0.5 M HCl. Shoot P uptake was  
227 calculated by multiplying the P concentration and shoot biomass.

228 After shoots were removed, root samples were collected using pin-board method as per  
229 Kano-Nakata et al (2012). In brief, roots were pinned with a 5 mm mesh net and pinboard after  
230 which soils were washed off and digital images were taken. The RGA was determined from the  
231 digital image as the angle from the soil surface to the shallowest nodal root using ImageJ software  
232 (Version 1.52a, NIH, USA). The root system was then divided into 12 compartments or into the  
233 center and both sides of the 0–3 cm, 3–7 m, 7–14 cm, and 14–28 cm soil layers to assess spatial  
234 root distributions. Root length and surface area of each compartment were measured using  
235 Epson Pro-selection X980 Scanner and WinRhizo Pro software (Regent Instruments, Quebec,  
236 Canada). Roots were classified as lateral roots (< 0.2 mm) (Sandhu et al. 2016) and nodal roots (0.2  
237 to 2 mm). Roots of > 2 mm were excluded from the analysis, as they were too large for a single root  
238 diameter and most likely occurred as a result of a measurement error. After the morphological  
239 analysis, root biomass of each compartment was determined by oven-drying at 70 °C for > 48 h.

## 240 **Statistical analysis**

241 JMP software (v14.0.0, SAS Institute Inc., Japan) was used to perform the statistical analyses.  
242 The treatment means were compared at 5% level of probability using Tukey's HSD test after  
243 the single and/or interaction effects of genotypes and P treatment were confirmed by a  
244 generalized linear model.

245

#### 246 **Acknowledgements**

247 We thank to Dr. Takuma Ishizaki, Dr. Hiroki Saito, and technical staff members of the Tropical  
248 Agricultural Research Front, Ishigaki Island, Japan, for supporting the experimental soil  
249 collection. The authors would like to thank Ms. Mayumi Yonemura, Japan International  
250 Research Center for Agricultural Sciences, for conducting soil and plant analysis.

251

252 **Figure legends**

253 **Fig. 1** Shoot biomass (A) and shoot P uptake (B) of rice genotypes as affected by different P  
254 application methods (P incorporation ( $P_{\text{inco}}$ ) of 500 mg  $P_2O_5$  box<sup>-1</sup> vs. P-dipping ( $P_{\text{dip}}$ ) of 90  
255 mg  $P_2O_5$  box<sup>-1</sup>) at 21 days after transplanting (DAT) and 42 DAT. Different letters and ns  
256 within each treatment indicate significant and non-significant differences, respectively,  
257 among genotypes at 5% using Tukey's HSD test. Error bars represent the standard error of  
258 replications. The \* and \*\* indicate that the interaction between genotype (G) and P  
259 application method (P) are significant at  $P < 5\%$  and  $P < 1\%$ , respectively.

260 **Fig. 2** Root growth angle (RGA) and proportions of root biomass and root surface area in  
261 different soil layers of *qsor1*-NIL, IR64, and *Dro1*-NIL at 21 days after transplanting  
262 (DAT) and 42 DAT under the  $P_{\text{dip}}$  treatment. Different letters in the same soil layer indicate  
263 significant differences among genotypes at 5% of Tukey's HSD test. ns: not significant at  
264 5% level.

265 **Fig. 3** Root growth angle (RGA) and proportions of root biomass and root surface area in  
266 different soil layers of *qsor1*-NIL, IR64, and *Dro1*-NIL at 21 days after transplanting  
267 (DAT) and 42 DAT under the  $P_{\text{inco}}$  treatment. Different letters in the same soil layer  
268 indicate significant differences among genotypes at 5% of Tukey's HSD test. ns: not  
269 significant at 5% level.

270 **Fig. 4** Root development in different soil layers and in total of all layers at 21 days after  
271 transplanting (DAT) and 42 DAT under the  $P_{\text{dip}}$  treatment. Different small letters and  
272 capital letters indicate significant differences among genotypes in these parameters within  
273 each soil layer and in total of all layers, respectively, at 5% of Tukey's HSD test. ns: not  
274 significant at 5% level.

275 **Fig. 5** Spatio-temporal variations in soluble P concentration as affected by different P  
276 application methods. The cross symbols indicate the value at the 3 cm depth of the P<sub>dip</sub>  
277 treatment. The open and closed circles indicate the value at the 7 cm depth of the P<sub>dip</sub>  
278 treatment and P<sub>inco</sub> treatment, respectively. The open and closed triangles indicate the value  
279 at the 21 cm depth of the P<sub>dip</sub> treatment and P<sub>inco</sub> treatment, respectively. Data values are an  
280 average of three rice genotypes because no significant genotype difference in soluble P  
281 concentration was observed at each sampling time. Error bars indicate standard error of  
282 replications. Different letters indicate significant differences at 5% using Tukey's HSD test  
283 among different soil depths (7 cm and 21 cm) by P application methods. The observation at  
284 3cm depth was only conducted in the P<sub>dip</sub> treatment.

285

## 286 LITERATURE CITED

- 287 Arai-Sanoh Y, Takai T, Yoshinaga S, Nakano H, Kojima M, Sakakibara H, Kondo M, Uga Y  
288 (2014) Deep rooting conferred by DEEPER ROOTING 1 enhances rice yield in paddy  
289 fields. *Scientific Reports* 4: 5563.
- 290 BurrIDGE JD, Findeis JL, Jochua CN, Miguel MA, Mubichi-Kut FM, Quinhentos ML, Xerinda  
291 SA, Lynch JP (2019) A case study on the efficacy of root phenotypic selection for  
292 edaphic stress tolerance in low-input agriculture: Common bean breeding in  
293 Mozambique. *Field Crops Res* 244: 107612
- 294 Carpenter SR, Bennett EM (2011) Reconsideration of the planetary boundary for phosphorus.  
295 *Environ Res Lett* 6 (1). doi:10.1088/1748-9326/6/1/014009

- 296 Jia X, Liu P, Lynch JP (2018) Greater lateral root branching density in maize improves  
297 phosphorus acquisition from low phosphorus soil. *J Exp Bot* 69 (20):4961-4970
- 298 Kano-Nakata M, Suralta RR, Niones JM, Yamauchi A (2012) Root sampling by using a root  
299 box-pinboard method. In *Methodologies for root drought studies in rice* (Shashidhar,  
300 H.E., Henry, A. & Hardy, B. eds.) 3–8 (IRRI, Los Baños 2012)
- 301 Kitomi Y, Hanzawa E, Kuya N, Inoue H, Hara N, Kawai S, Kanno N, Endo M, Sugimoto K,  
302 Yamazaki T, Sakamoto S, Sentoku N, Wu J, Kanno H, Mitsuda N, Toriyama K, Sato T,  
303 Uga Y (2020) Root angle modifications by the DRO1 homolog improve rice yields in  
304 saline paddy fields. *PNAS* 117(35): 21242-21250
- 305 Lynch JP (2019) Root phenotypes for improved nutrient capture: an underexploited opportunity  
306 for global agriculture. *New Phytol* 223 (2):548-564
- 307 Lynch JP, Brown KM (2001) Topsoil foraging – an architectural adaptation of plants to low  
308 phosphorus availability. *Plant Soil* 237: 225-237
- 309 Lynch JP, Ho MD (2005) Rhizoeconomics: Carbon costs of phosphorus acquisition. *Plant Soil*  
310 269 (1-2):45-56
- 311 Miguel MA, Postma JA, Lynch JP (2015) Phenotypic synergism between root hair length and basal  
312 root growth angle for phosphorus acquisition. *Plant Physiol* 167 (4): 1430-1439
- 313 Miller CR, Ochoa I, Nielsen KL, Beck D, Lynch JP (2003) Genetic variation for adventitious  
314 rooting in response to low phosphorus availability: potential utility for  
315 phosphorus acquisition from stratified soils. *Funct Plant Biol* 30 (9): 973-985
- 316 Mori A, Fukuda T, Vejchasarn P, Nestler J, Pariasca-Tanaka J, Wissuwa M (2016) The role of  
317 root size versus root efficiency in phosphorus acquisition of rice. *J Exp Bot* 67: 1179–  
318 1189

- 319 Motomizu S, Wakimoto T, Toei K (1983) Spectrophotometric determination of phosphate in  
320 river waters with molybdate and malachite green. *Analyst* 108: 361–367
- 321 Nedelciu CE, Ragnarsdottir KV, Schlyter P, Stjernquist I (2020) Global phosphorus supply  
322 chain dynamics: Assessing regional impact to 2050. *Glob Food Sec* 26:100426
- 323 Nestler J, Keyes SD, Wissuwa M (2016) Root hair formation in rice (*Oryza sativa* L.) differs  
324 between root types and is altered in artificial growth conditions. *J Exp Bot* 67  
325 (12):3699-3708
- 326 Oo AZ, Tsujimoto Y, Rakotoarisoa NM, Kawamura K, Nishigaki T (2020) P-dipping of rice  
327 seedlings increases applied P use efficiency in high P-fixing soils. *Sci Rep* 10: 11919
- 328 Rakotoarisoa NM, Tsujimoto Y, Oo A Z (2020) Dipping rice roots in P-enriched slurry at  
329 transplanting significantly affects grain yield and phenology development in severely  
330 P-deficient fields in Madagascar’s central highlands. *Field Crop Res* 254: 107806.
- 331 Rangarajan H, Postma JA, Lynch JP (2018) Co-optimization of axial root phenotypes for  
332 nitrogen and phosphorus acquisition in common bean. *Ann Bot* 122 (3): 485-499
- 333 Rose TJ, Impa SM, Rose MT, Pariasca-Tanaka J, Mori A, Heuer S, Johnson-Beebout SE,  
334 Wissuwa M (2013) Enhancing phosphorus and zinc acquisition efficiency in rice: a  
335 critical review of root traits and their potential utility in rice breeding. *Ann Bot* 112 (2):  
336 331-345
- 337 Sandhu N, Raman KA, Torress RO, Audebert A, Dardou A, Kumar A, Henry A (2016) Rice  
338 root architectural plasticity traits and genetic regions of adaptability to variable  
339 cultivation and stress conditions. *Plant Physiol* 171: 2562-2576
- 340 Sun B, Gao Y, Lynch JP (2018) Large Crown Root Number Improves Topsoil Foraging and  
341 Phosphorus Acquisition. *Plant Physiol* 177 (1): 90-104



- 342 Tsujimoto Y, Rakotoson T, Tanaka A, Saito K (2019) Challenges and opportunities for  
343 improving N use efficiency for rice production in sub-Saharan Africa. *Plant Prod*  
344 *Sci* 22(4): 413–427
- 345 Turner FT, Gilliam JW (1976) Increased P diffusion as an explanation of increased P  
346 availability in flooded rice soils. *Plant Soil* 45: 365-377
- 347 Uga Y, Sugimoto K, Ogawa S, Rane J, Ishitani M, Hara N, Kitomi Y, Inuki Y, Ono K, Kanno  
348 N, Inoue H, Takehisa H, Motoyama R, Nagamura Y, Wu J, Matsumoto T, Takai T,  
349 Okuno K, Yano M (2013) Control of RGA by DEEPER ROOTING 1 increases rice  
350 yield under drought conditions. *Nat Genet* 45: 1097–1102
- 351 Uga Y, Kitomi Y, Ishikawa S, Yano M (2015) Genetic improvement for root growth angle to  
352 enhance crop production. *Breeding Science* 65 (2): 111–119
- 353 Vance CP, Uhde-Stone C, Allan D.L (2003) Phosphorus acquisition and use: critical  
354 adaptations by plants for securing a nonrenewable resource. *New Phytol* 157: 423–447
- 355 Vandamme E, Ahouanton K, Mwakasege L, Mujuni S, Mujawamariya G, Kamanda J,  
356 Senthilkumar K, Saito K (2018) Phosphorus micro-dosing as an entry point to  
357 sustainable intensification of rice systems in sub-Saharan Africa. *Field Crop Res* 222:  
358 39-49
- 359 Walker TW, Syers JK (1976) The fate of phosphorus during pedogenesis. *Geoderma* 15 (1):  
360 1-19
- 361 Zhu J, Kaeppler SM, Lynch JP (2005) Topsoil foraging and phosphorus acquisition efficiency  
362 in maize (*Zea mays*). *Funct Plant Biol* 32:749-762

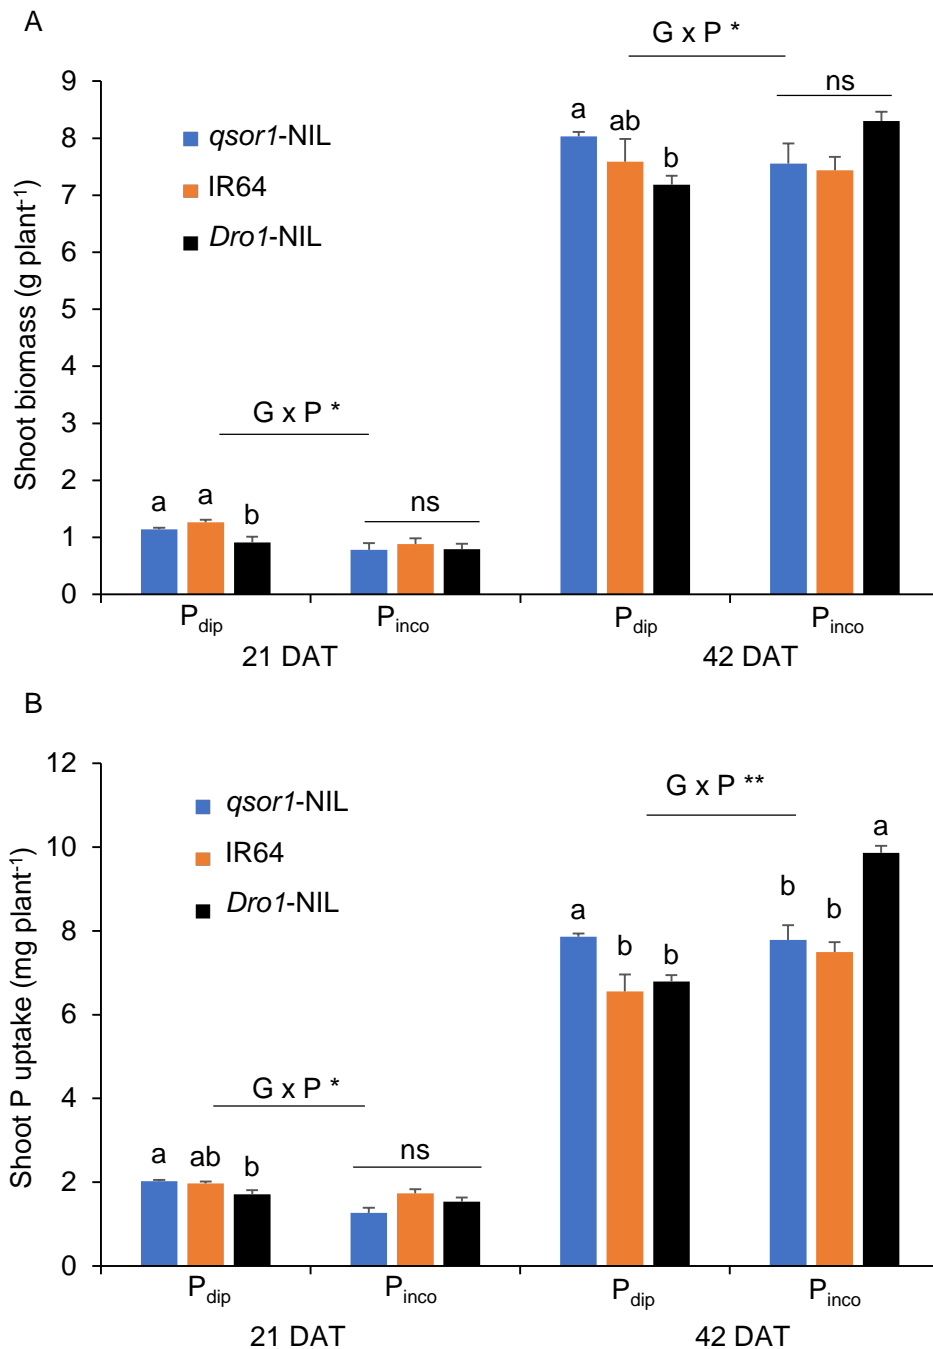

**Fig. 1** Shoot biomass (A) and shoot P uptake (B) of rice genotypes as affected by different P application methods (P incorporation (P<sub>inco</sub>) of 500 mg P<sub>2</sub>O<sub>5</sub> box<sup>-1</sup> vs. P-dipping (P<sub>dip</sub>) of 90 mg P<sub>2</sub>O<sub>5</sub> box<sup>-1</sup>) at 21 days after transplanting (DAT) and 42 DAT. Different letters and ns within each treatment indicate significant and non-significant differences, respectively, among genotypes at 5% using Tukey's HSD test. Error bars represent the standard error of replications. The \* and \*\* indicate that the interaction between genotype (G) and P application method (P) are significant at P < 5% and P < 1%, respectively.

|                                  | RGA (degree) |       | Root biomass (%) |        | Root surface area (%) |        |
|----------------------------------|--------------|-------|------------------|--------|-----------------------|--------|
|                                  | 21DAT        | 42DAT | 21DAT            | 42DAT  | 21DAT                 | 42DAT  |
| <b><i>qsor1</i>-NIL (21 DAT)</b> |              |       |                  |        |                       |        |
| 0-3 cm                           | 7.1b         | 6.8c  | 50.3a            | 43.0a  | 41.9a                 | 29.1a  |
| 3-7 cm                           |              |       | 30.1ns           | 21.3ns | 33.9ns                | 22.4a  |
| 7-14 cm                          |              |       | 17.7b            | 21.4c  | 22.0b                 | 26.2ns |
| 14-28 cm                         |              |       | 2.0b             | 14.4c  | 2.2b                  | 22.3c  |
| <b>IR64 (21 DAT)</b>             |              |       |                  |        |                       |        |
| 0-3 cm                           | 23.6a        | 20.8b | 36.9b            | 30.1b  | 28.6b                 | 23.1b  |
| 3-7 cm                           |              |       | 31.6ns           | 19.4ns | 33.3ns                | 20.9ab |
| 7-14 cm                          |              |       | 26.1a            | 25.6a  | 31.2a                 | 27.0ns |
| 14-28 cm                         |              |       | 5.4b             | 24.9b  | 6.9b                  | 29.0b  |
| <b><i>Dro1</i>-NIL (21 DAT)</b>  |              |       |                  |        |                       |        |
| 0-3 cm                           | 33.3a        | 30.8a | 32.7b            | 26.9b  | 26.7b                 | 21.6b  |
| 3-7 cm                           |              |       | 31.4ns           | 19.1ns | 30.5ns                | 18.6b  |
| 7-14 cm                          |              |       | 25.6a            | 23.6b  | 30.3a                 | 25.7ns |
| 14-28 cm                         |              |       | 10.3a            | 30.4a  | 12.5a                 | 34.1a  |

**Fig. 2** Root growth angle (RGA) and proportions of root biomass and root surface area in different soil layers of *qsor1*-NIL, IR64, and *Dro1*-NIL at 21 days after transplanting (DAT) and 42 DAT under the  $P_{dip}$  treatment. Different letters in the same soil layer indicate significant differences among genotypes at 5% of Tukey's HSD test. ns: not significant at 5% level.

|                           |                                                                                     | RGA<br>(degree) |       | Root biomass<br>(%) |        | Root surface<br>area (%) |        |
|---------------------------|-------------------------------------------------------------------------------------|-----------------|-------|---------------------|--------|--------------------------|--------|
|                           |                                                                                     | 21DAT           | 42DAT | 21DAT               | 42DAT  | 21DAT                    | 42DAT  |
| <b>qsor1-NIL (21 DAT)</b> |                                                                                     |                 |       |                     |        |                          |        |
| 0-3 cm                    |    | 5.0b            | 4.5c  | 55.0a               | 39.9a  | 43.4a                    | 29.2ns |
| 3-7 cm                    |    |                 |       | 31.9ns              | 25.4a  | 41.6ns                   | 24.5a  |
| 7-14 cm                   |    |                 |       | 12.9b               | 21.5ns | 14.7ns                   | 25.7ns |
| 14-28 cm                  |    |                 |       | 0.3ns               | 13.2b  | 0.3ns                    | 20.7b  |
| <b>IR64 (21 DAT)</b>      |                                                                                     |                 |       |                     |        |                          |        |
| 0-3 cm                    |    | 39.8a           | 38.0b | 39.7ab              | 39.4a  | 33.6b                    | 27.4ns |
| 3-7 cm                    |    |                 |       | 39.0ns              | 19.8b  | 41.4ns                   | 18.8b  |
| 7-14 cm                   |    |                 |       | 19.4ab              | 22.8ns | 23.2ns                   | 26.5ns |
| 14-28 cm                  |   |                 |       | 1.9ns               | 17.9b  | 1.8ns                    | 27.4a  |
| <b>Dro1-NIL (21 DAT)</b>  |                                                                                     |                 |       |                     |        |                          |        |
| 0-3 cm                    |  | 52.2a           | 48.2a | 33.5b               | 30.0b  | 36.9b                    | 24.3ns |
| 3-7 cm                    |  |                 |       | 36.0ns              | 19.7b  | 36.5ns                   | 19.9b  |
| 7-14 cm                   |  |                 |       | 24.3a               | 23.2ns | 21.9ns                   | 25.9ns |
| 14-28 cm                  |  |                 |       | 6.2ns               | 27.1a  | 4.7ns                    | 29.9a  |

**Fig. 3** Root growth angle (RGA) and proportions of root biomass and root surface area in different soil layers of *qsor1*-NIL, IR64, and *Dro1*-NIL at 21 days after transplanting (DAT) and 42 DAT under the  $P_{inco}$  treatment. Different letters in the same soil layer indicate significant differences among genotypes at 5% of Tukey's HSD test. ns: not significant at 5% level.

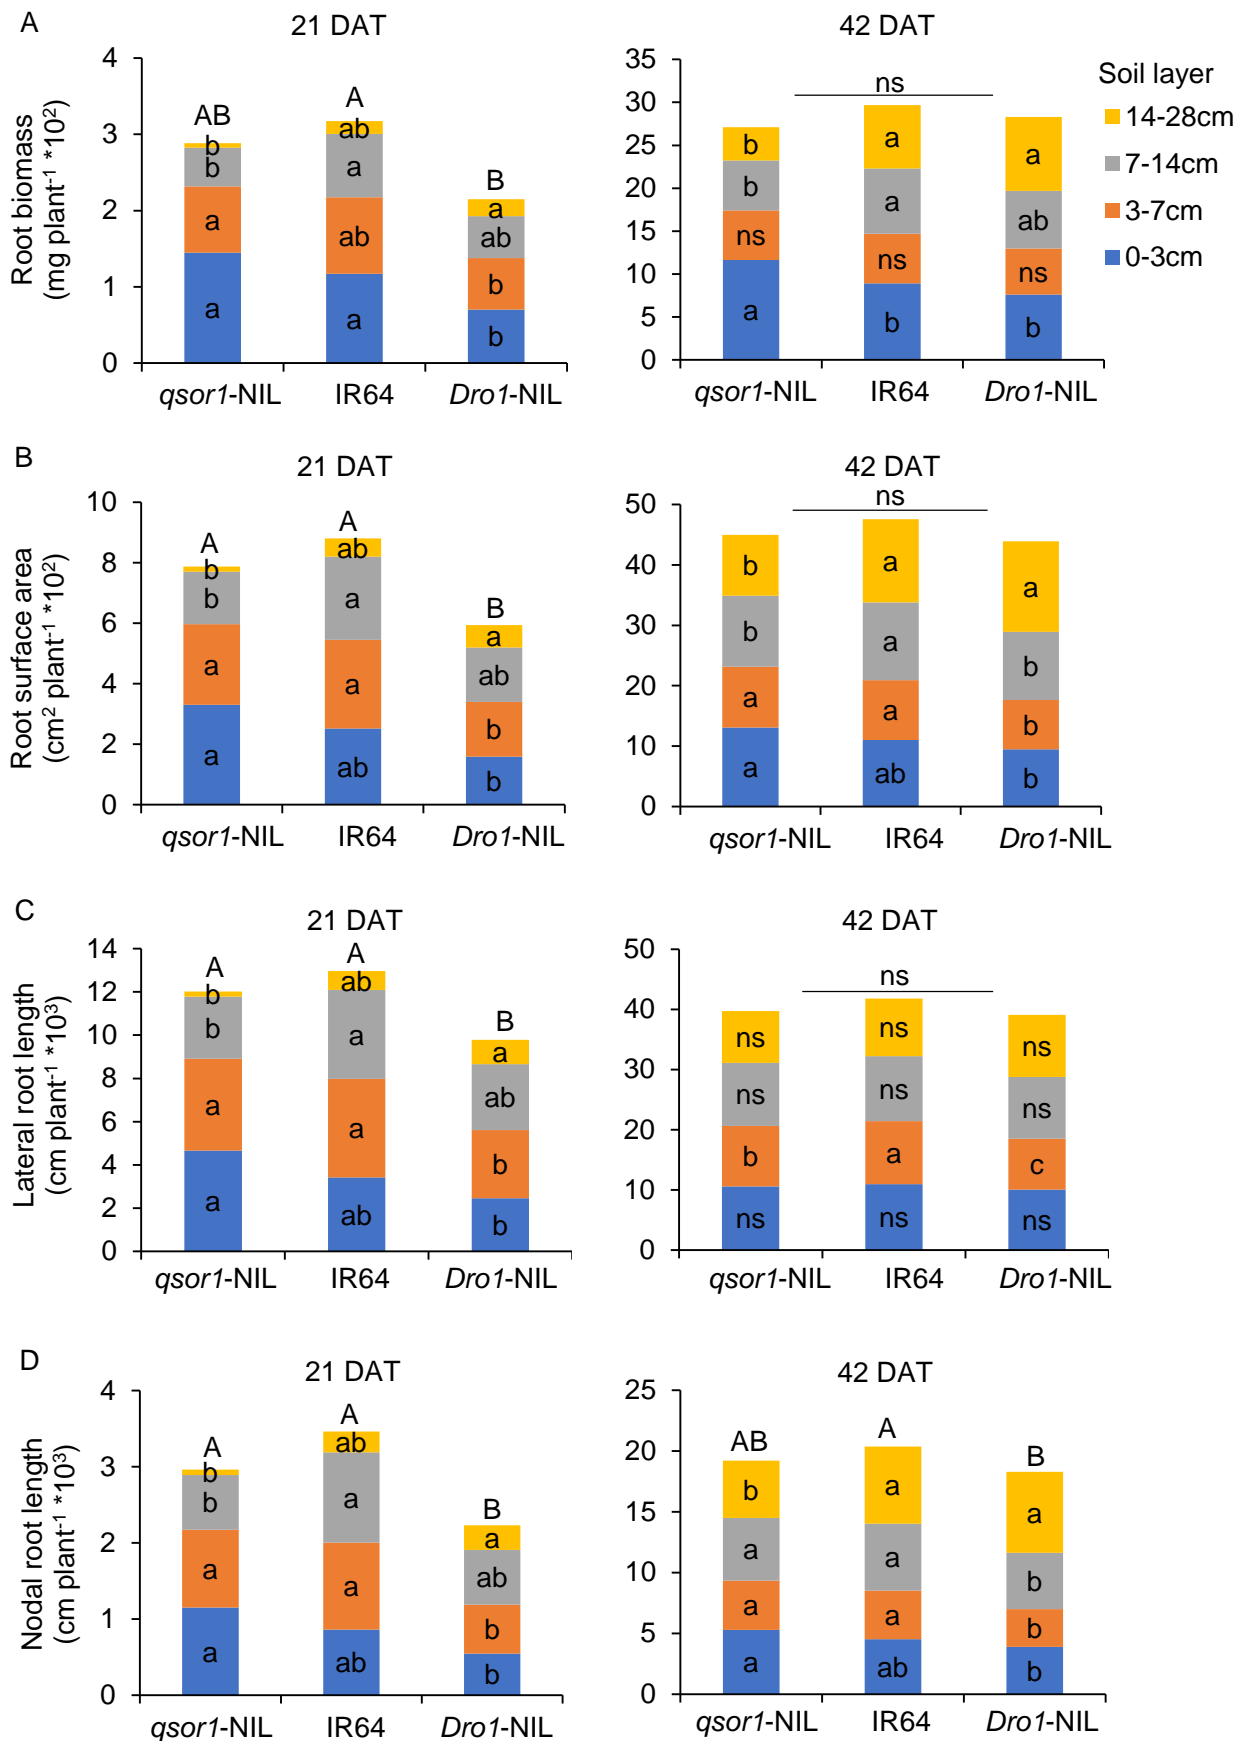

**Fig. 4** Root development in different soil layers and in total of all layers at 21 days after transplanting (DAT) and 42 DAT under the  $P_{dip}$  treatment. Different small letters and capital letters indicate significant differences among genotypes in these parameters within each soil layer and in total of all layers, respectively, at 5% of Tukey's HSD test. ns: not significant at 5% level.

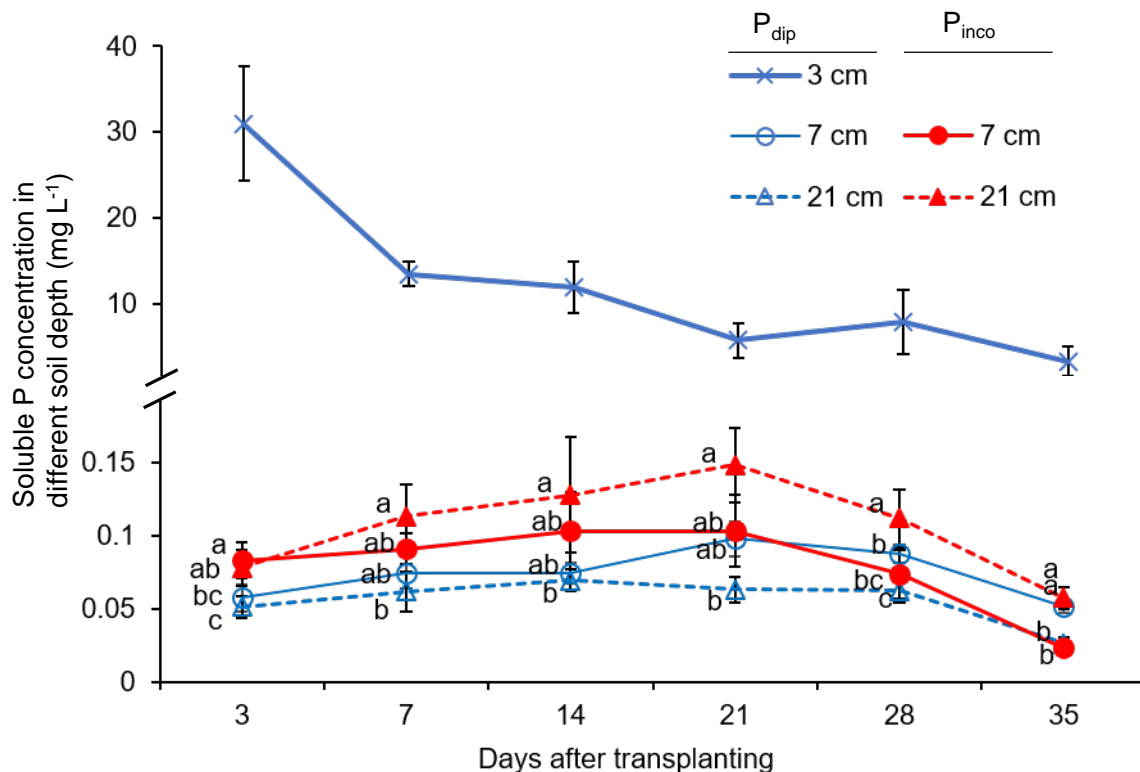

**Fig. 5** Spatio-temporal variations in soluble P concentration as affected by different P application methods. The cross symbols indicate the value at the 3 cm depth of the P<sub>dip</sub> treatment. The open and closed circles indicate the value at the 7 cm depth of the P<sub>dip</sub> treatment and P<sub>inco</sub> treatment, respectively. The open and closed triangles indicate the value at the 21 cm depth of the P<sub>dip</sub> treatment and P<sub>inco</sub> treatment, respectively. Data values are an average of three rice genotypes because no significant genotype difference in soluble P concentration was observed at each sampling time. Error bars indicate standard error of replications. Different letters indicate significant differences at 5% using Tukey's HSD test among different soil depths (7 cm and 21 cm) by P application methods. The observation at 3cm depth was only conducted in the P<sub>dip</sub> treatment.

## Parsed Citations

Arai-Sanoh Y, Takai T, Yoshinaga S, Nakano H, Kojima M, Sakakibara H, Kondo M, Uga Y (2014) Deep rooting conferred by DEEPER ROOTING 1 enhances rice yield in paddy fields. *Scientific Reports* 4: 5563.

Google Scholar: [Author Only](#) [Title Only](#) [Author and Title](#)

Burridge JD, Findeis JL, Jochua CN, Miguel MA, Mubichi-Kut FM, Quinhentos ML, Xerinda SA, Lynch JP (2019) A case study on the efficacy of root phenotypic selection for edaphic stress tolerance in low-input agriculture: Common bean breeding in Mozambique. *Field Crops Res* 244: 107612

Google Scholar: [Author Only](#) [Title Only](#) [Author and Title](#)

Carpenter SR, Bennett EM (2011) Reconsideration of the planetary boundary for phosphorus. *Environ Res Lett* 6 (1). doi:10.1088/1748-9326/6/1/014009

Google Scholar: [Author Only](#) [Title Only](#) [Author and Title](#)

Jia X, Liu P, Lynch JP (2018) Greater lateral root branching density in maize improves phosphorus acquisition from low phosphorus soil. *J Exp Bot* 69 (20):4961-4970

Google Scholar: [Author Only](#) [Title Only](#) [Author and Title](#)

Kano-Nakata M, Suraita RR, Niones JM, Yamauchi A (2012) Root sampling by using a root box-pinboard method. In *Methodologies for root drought studies in rice* (Shashidhar, H.E., Henry, A. & Hardy, B. eds.) 3–8 (IRRI, Los Baños 2012)

Google Scholar: [Author Only](#) [Title Only](#) [Author and Title](#)

Kitomi Y, Hanzawa E, Kuya N, Inoue H, Hara N, Kawai S, Kanno N, Endo M, Sugimoto K, Yamazaki T, Sakamoto S, Sentoku N, Wu J, Kanno H, Mitsuda N, Toriyama K, Sato T, Uga Y (2020) Root angle modifications by the DRO1 homolog improve rice yields in saline paddy fields. *PNAS* 117(35): 21242-21250

Google Scholar: [Author Only](#) [Title Only](#) [Author and Title](#)

Lynch JP (2019) Root phenotypes for improved nutrient capture: an underexploited opportunity for global agriculture. *New Phytol* 223 (2):548-564

Google Scholar: [Author Only](#) [Title Only](#) [Author and Title](#)

Lynch JP, Brown KM (2001) Topsoil foraging – an architectural adaptation of plants to low phosphorus availability. *Plant Soil* 237: 225-237

Google Scholar: [Author Only](#) [Title Only](#) [Author and Title](#)

Lynch JP, Ho MD (2005) Rhizoeconomics: Carbon costs of phosphorus acquisition. *Plant Soil* 269 (1-2):45-56

Google Scholar: [Author Only](#) [Title Only](#) [Author and Title](#)

Miguel MA, Postma JA, Lynch JP (2015) Phenological synergism between root hair length and basal root growth angle for phosphorus acquisition. *Plant Physiol* 167 (4): 1430-1439

Google Scholar: [Author Only](#) [Title Only](#) [Author and Title](#)

Miller CR, Ochoa I, Nielsen KL, Beck D, Lynch JP (2003) Genetic variation for adventitious rooting in response to low phosphorus availability: potential utility for phosphorus acquisition from stratified soils. *Funct Plant Biol* 30 (9): 973-985

Google Scholar: [Author Only](#) [Title Only](#) [Author and Title](#)

Mori A, Fukuda T, Vejchasarn P, Nestler J, Pariasca-Tanaka J, Wissuwa M (2016) The role of root size versus root efficiency in phosphorus acquisition of rice. *J Exp Bot* 67: 1179–1189

Google Scholar: [Author Only](#) [Title Only](#) [Author and Title](#)

Motomizu S, Wakimoto T, Toei K (1983) Spectrophotometric determination of phosphate in river waters with molybdate and malachite green. *Analyst* 108: 361–367

Google Scholar: [Author Only](#) [Title Only](#) [Author and Title](#)

Nedelciu CE, Ragnarsdottir KV, Schlyter P, Stjernquist I (2020) Global phosphorus supply chain dynamics: Assessing regional impact to 2050. *Glob Food Sec* 26:100426

Google Scholar: [Author Only](#) [Title Only](#) [Author and Title](#)

Nestler J, Keyes SD, Wissuwa M (2016) Root hair formation in rice (*Oryza sativa* L.) differs between root types and is altered in artificial growth conditions. *J Exp Bot* 67 (12):3699-3708

Google Scholar: [Author Only](#) [Title Only](#) [Author and Title](#)

Oo AZ, Tsujimoto Y, Rakotoarisoa NM, Kawamura K, Nishigaki T (2020) P-dipping of rice seedlings increases applied P use efficiency in high P-fixing soils. *Sci Rep* 10: 11919

Google Scholar: [Author Only](#) [Title Only](#) [Author and Title](#)

Rakotoarisoa NM, Tsujimoto Y, Oo AZ (2020) Dipping rice roots in P-enriched slurry at transplanting significantly affects grain yield and phenology development in severely P-deficient fields in Madagascar's central highlands. *Field Crop Res* 254: 107806.

Google Scholar: [Author Only](#) [Title Only](#) [Author and Title](#)

Rangarajan H, Postma JA, Lynch JP (2018) Co-optimization of axial root phenotypes for nitrogen and phosphorus acquisition in common bean. *Ann Bot* 122 (3): 485-499

Google Scholar: [Author Only](#) [Title Only](#) [Author and Title](#)

**Rose TJ, Impa SM, Rose MT, Pariasca-Tanaka J, Mori A, Heuer S, Johnson-Beebout SE, Wssuwa M (2013) Enhancing phosphorus and zinc acquisition efficiency in rice: a critical review of root traits and their potential utility in rice breeding. *Ann Bot* 112 (2): 331-345**

Google Scholar: [Author Only](#) [Title Only](#) [Author and Title](#)

**Sandhu N, Raman KA, Torress RO, Audebert A, Dardou A, Kumar A, Henry A (2016) Rice root architectural plasticity traits and genetic regions of adaptability to variable cultivation and stress conditions. *Plant Physiol* 171: 2562-2576**

Google Scholar: [Author Only](#) [Title Only](#) [Author and Title](#)

**Sun B, Gao Y, Lynch JP (2018) Large Crown Root Number Improves Topsoil Foraging and Phosphorus Acquisition. *Plant Physiol* 177 (1): 90-104**

Google Scholar: [Author Only](#) [Title Only](#) [Author and Title](#)

**Tsujimoto Y, Rakotoson T, Tanaka A, Saito K (2019) Challenges and opportunities for improving N use efficiency for rice production in sub-Saharan Africa. *Plant Prod Sci* 22(4): 413–427**

Google Scholar: [Author Only](#) [Title Only](#) [Author and Title](#)

**Turner FT, Gilliam JW (1976) Increased P diffusion as an explanation of increased P availability in flooded rice soils. *Plant Soil* 45: 365-377**

Google Scholar: [Author Only](#) [Title Only](#) [Author and Title](#)

**Uga Y, Sugimoto K, Ogawa S, Rane J, Ishitani M, Hara N, Kitomi Y, Inuki Y, Ono K, Kanno N, Inoue H, Takehisa H, Motoyama R, Nagamura Y, Wu J, Matsumoto T, Takai T, Okuno K, Yano M (2013) Control of RGA by DEEPER ROOTING 1 increases rice yield under drought conditions. *Nat Genet* 45: 1097–1102**

Google Scholar: [Author Only](#) [Title Only](#) [Author and Title](#)

**Uga Y, Kitomi Y, Ishikawa S, Yano M (2015) Genetic improvement for root growth angle to enhance crop production. *Breeding Science* 65 (2): 111–119**

Google Scholar: [Author Only](#) [Title Only](#) [Author and Title](#)

**Vance CP, Uhde-Stone C, Allan D.L (2003) Phosphorus acquisition and use: critical adaptations by plants for securing a nonrenewable resource. *New Phytol* 157: 423–447**

Google Scholar: [Author Only](#) [Title Only](#) [Author and Title](#)

**Vandamme E, Ahouanton K, Mwakasege L, Mujuni S, Mujawamariya G, Kamanda J, Senthilkumar K, Saito K (2018) Phosphorus micro-dosing as an entry point to sustainable intensification of rice systems in sub-Saharan Africa. *Field Crop Res* 222: 39-49**

Google Scholar: [Author Only](#) [Title Only](#) [Author and Title](#)

**Walker TW, Syers JK (1976) The fate of phosphorus during pedogenesis. *Geoderma* 15 (1): 1-19**

Google Scholar: [Author Only](#) [Title Only](#) [Author and Title](#)

**Zhu J, Kaeppler SM, Lynch JP (2005) Topsoil foraging and phosphorus acquisition efficiency in maize (*Zea mays*). *Funct Plant Biol* 32:749-762**

Google Scholar: [Author Only](#) [Title Only](#) [Author and Title](#)
